# Supplementary material
Source: PubMed Central journal article supplement (PMC3033762)
Supplement: NIHMS260287-supplement-1.pdf [file NIHMS260287-supplement-1.pdf]

**Supplemental Data Table 1.** Characteristics of the Framingham Offspring Cohort at Exam Cycle 7.  
(n=3300)

| Variable                             | Value          |
|--------------------------------------|----------------|
| Age (years)                          | 61 (± 10)      |
| Female (%)                           | 53.5           |
| Body mass index (kg/m <sup>2</sup> ) | 28.2 (± 5.3)   |
| Cigarette smoking (%)                | 13.0           |
| Diabetes mellitus (%)                | 13.4           |
| Fasting blood glucose (mmol/L)       | 5.79 (± 1.52)  |
| Systolic blood pressure (mm Hg)      | 127.0 (± 18.8) |
| Total cholesterol (mmol/L)           | 5.19 (± 0.95)  |
| HDL cholesterol (mmol/L)             | 1.39 (± 0.44)  |
| Triglycerides (mmol/L)               | 1.55 (± 1.00)  |
| γ fibrinogen (g/L)                   | 0.26 (± 0.12)  |
| Prevalent CVD (%)                    | 12.8           |
